# Supplementary material for: Oxidized Albumin and Cartilage Acidic Protein-1 as Blood Biomarkers to Predict Ischemic Stroke Outcomes
Source: Front Neurol. 2021 Nov 30;12:686555. doi: 10.3389/fneur.2021.686555 (PMC8670551; doi:10.3389/fneur.2021.686555)
Supplement: Supplementary file 1 [file Table_1.XLSX]

## Sheet: Raw_Data
ID	Age	Gender	edaravone treatment	thrombolytic therapy	catheter directed thrombolysis	NIHSS (admission)	NIHSS (discharge)	NIHSS (recover)	mRankin (discharge)	mRankin (3 months)	Systolic arterial pressure	Diastolic pressure	White blood cells	Red blood cells	Hematocrit	Hemoglobin	Platelet	AST	ALT	LDH	ALP	γ-GTP	T-Bil	Total cholesterol	LDL cholesterol	HDL cholesterol	TG	TP	Albumin	Albumin	CPK	BUN	Cr	eGFR	Urinary acid	FBS	BS	HbA1c	HbA1c	CRP	PT	APTT	Fibrinogen	D-dimer	OxHSA (day0)	CRTAC1 (day0)	OxHSA (day1)	CRTAC1 (day1)	OxHSA (day7)
OA0011	57	F	Done			2	0	-2	0	0																																			0.413661	189.086	0.398276	332.169	0.397755
OA0015	65	M	Done			1	0	-1	0	0	152	84	8600	406	35.4	11.8	36.5	28	45	180	222	70	0.5	244	155	71	105	6.6	3.9	3.9	44	14	0.75	80.2	4.1	87	109	6.1	6.5	0.27	0.95	30.7	250	0	0.375456	124.212	0.416816	238.139	0.392977
OA0027	65	M	Done			1	0	-1	0	0	102	70	8100	536	49.3	17.1	23.3	23	36	250	251	33	1	175	105	46	77	6.6	4.2	4.2	107	17	0.88	67.3	8.4	86	100	5.1	5.5	0.06	0.94	27.4	313	0.2	0.420689	74.376	0.395742	205.774	0.422545
OA0030	35	M	Done			0	0	0	0	0	168	95	6200	503	45.2	16	23.1	20	20	294	159	22	0.5	255	158	54	135	6.9	4.3	4.3	169	15	1.28	53.4	8	89	95	4.8	5.1	0.07	0.91	25.4	293	0.2	0.484504	125.164	0.455093	213.161	0.436391
OA0031	68	F	Done			1	0	-1	0	0	170	107	5300	391	34.6	11.6	13	28	16	195	223	43	0.5	144	65	51	73	6.7	3.8	3.8	41	13	0.89	48.5	5.8	88	98	5.1	5.5	0.27	0.92	26.4	357	0.8	0.388652	195.596	0.402422	207.804	0.414122
OA0032	36	F	Done			0	0	0	0	0	196	115	8000	560	48.7	16.4	27.9	52	97	220	270	97	0.6	237	173	36	217	6.6	3.9	3.9	62	8	0.39	143.6	3.8	219	200	9.7	10.1	0.65	0.97	28.2	293	0.5	0.429072	183.099	0.400205	153.616	0.415728
OA0038	79	M	Done			0	0	0	0	0	160	73	6600	404	39.7	13.7	18.8	20	12	133	319	142	0.6	188	86	70	146	6.7	3.8	3.8	77	17	0.92	60.6	8.5	92	87	4.7	5	0.35	1.01	27.5	201	0.8	0.421186	189.828	0.401253	216.085	0.411559
OA0041	61	M	Done			4	0	-4	0	0	161	78	4400	418	38	13.3	13	39	34	309	228	68	0.7	177	98	43	171	6.8	4.4	4.4	156	14	0.71	86.7	7.9	103	116	4.8	5.1	0.05	0.92	27.8	265	4.3	0.359772	157.337	0.367388	177.369	0.374761
OA0043	72	F		Done		3	0	-3	0	0	173	103	6000	317	29.1	9.1	19.1	19	14	194	404	13	0.1	117	38	54	102	6.8	4	4	74	34	7.97	4.3	5	111	111	4.8	5.1	0	1.04	29.2	289	0.5	0.435256	191.402	0.495599	289.877	0.488412
OA0047	70	M	Done			0	0	0	0	0																																			0.318601	128.628	0.340228	151.36	0.3022
OA0051	70	M	Done			0	0	0	0	0	190	102	6600	450	41.6	14.1	24.2	31	18	336	236	26	0.7	206	103	74	108	6.6	4.1	4.1	242	18	0.97	59.3	5.9	94	128	4.9	5.2	0.05	0.98	26.9	350	3	0.388117	236.141	0.391089	372.381	0.410958
OA0055	70	F	Done			1	0	-1	0	0	162	90	5100	492	12.6	13.9	18.4	21	10	312	315	15	0.6	167	84	47	196	7.5	4.6	4.6	51	16	0.48	94.5	3.7	111	104	5.8	6.2	0.22	0.99	33.9	361	0.2	0.378365	123.372	0.364842	216.512	0.325196
OA0067	69	M	Done			0	0	0	0	0	121	59	6300	463	44.8	15	40.1	20	31	185	242	51	0.7	279	209	33	140	7.1	4.2	4.2	85	14	0.74	80	6.3	85	105	5.7	6.1	0.3	0.97	28.5	419	0.6	0.406141	103.55	0.401827	177.625	0.377333
OA0076	65	F	Done			1	0	-1	0	0	130	75	7500	376	36.2	12.1	31.3	16	14	174	164	17	0.6	184	120	44	100	6.6	3.5	3.8	62	18	0.56	81.6	7.3	95	95	5.4	5.8	0.2	1.03	26.8	242	0.7	0.370723	149.406	0.372386	483.975	0.378473
OA0001	81	F	Done			1	1	0	1	0	139	96	4600	426	40.1	13.2	23.2	19	14	246	261	19	0.4	235	142	50	185	7.2	4.1	4.1	100	13	0.58	73.7	5.1	93	96	5.1	5.5	0.95	1.03	28.4	366	0.9	0.347162	156.875	0.344017	151.457	0.376934
OA0008	84	M	Done			2	2	0	1	0	160	73	6700	440	44.9	14.6	18.9	29	19	226	195	25	0.9	165	102	55	39	7.6	4.5	4.5	142	15	1.2	45.3	7.9	101	101	4.9	5.2	0.13	1.72	30.3	286	0.4	0.416958	190.861	0.414338	218.282	0.403818
OA0020	43	M	Done			1	0	-1	1	0	105	62	3400	648	48.2	16.1	9.3	29	23	185	336	142	2.2	141	72	54	46	8.5	4.5	4.5	87	17	0.76	89	6.2	101	132	7.1	7.5	0.27	1.73	41.9	227	0.5	0.44872	207.164	0.377009	293.261	0.433185
OA0024	79	M	Done			0	0	0	1	0	140	66	4300	456	41.9	14.4	17.3	20	14	193	260	38	0.6	182	104	53	74	6.9	4	4	128	15	0.79	71.6	6	92	112	5.5	5.9	0.08	1.06	27	271	0.8	0.37763	186.466	0.34515	219.619	0.326225
OA0040	76	M	Done			1	1	0	1	0	208	111	9200	582	52.2	19.5	19.7	39	23	274	288	151	1.7	221	98	46	385	7.1	4	4	120	11	0.93	60.6	8.6	119	106	5.4	5.8	0.16	1.59	31.1	293	0	0.379912	163.247	0.396883	209.221	0.408416
OA0044	85	M				2	1	-1	1	0	154	92	10500	422	38.9	13.7	15.1	19	13	203	260	27	0.5	178	121	38	93	6.6	4	4	69	23	1.28	41.4		94	208	5.1	5.5	0.2	0.98	27.4	253	2.1	0.427409	532.373	0.408341	212.842	0.418227
OA0052	79	M	Done			2	2	0	1	0	145	69	9600	513	43	14.7	36.3	24	19	272	394	42	0.2	159	73	45	294	7.1	3.3	3.6	44	23	1.04	53	6.2	333	522	14	14.5	0.65	0.98	26.3	405	3.3	0.472216	140.325	0.438421	277.917	0.431251
OA0056	81	M				1	1	0	1	0	162	83	6900	455	39.9	13.4	21.3	20	17	154	211	57	0.6	179	104	54	71	7	4.3	4.3	59	20	1	56	6	109	179	6.2	6.6	0.8	1.12	31.9	389	0.7	0.426582	138.652	0.404134	255.153	0.413073
OA0072	73	M	Done			1	1	0	1	0	179	80	7600	447	41.3	14.6	25.9	29	33	294	218	26	0.6	175	117	39	115	7	4.2	4.2	260	12	0.66	89.2	4.1	88	93	5.1	5.5	0.08	0.97	35.4	292	0.4	0.425123	88.293	0.419327	100.359	0.422739
OA0077	46	M	Done			1	1	0	1	0	127	76	6500	504	42.4	14.9	24.8	17	28	146	223	33	0.5	368	94	42	1386	6.7	4.3	4.3	66	13	0.74	89.9	3.6	147	470	12.2	12.7	0.13	0.84	28	193	0	0.325436	171.197	0.375143	239.501	0.331358
OA0022	92	F	Done			0	0	0	2	0	138	81	4400	411	39.7	13.8	17.8	26	11	301	91	17	0.7	239	149	59	108	8.1	4.6	4.6	118	18	0.74	54.4	6.4	100	92	5.9	6.3	0.06	1.11	32.1	245	0.8	0.428761	123.48	0.417615	156.315	0.423545
OA0068	83	F	Done			2	2	0	2	0	173	80	6400	446	38.5	13.4	22.1	22	20	216	227	14	0.4	154	83	35	96	7.9	4.7	4.7	40	24	0.69	60.5	4.9	96	117	5.1	5.5	0.13	1.05	25.6	299	0.4	0.422915	116.996	0.394851	164.942	0.394128
OA0003	91	F	Done			0	0	0	0	1	129	70	8500	414	38.2	12.9	20	37	21	293	483	22	1	161	105	38	72	7.4	3.4	3.7	88	20	0.82	48.8	6	133	157	6.3	6.7	0.65	2.08	32.9	349	4.6	0.507016	210.25	0.415839	446.697	0.419411
OA0012	72	M	Done			0	0	0	0	1	134	70	5400	411	36.1	12.6	21.1	19	14	206	178	22	1.1	237	115	76	267	6.6	4.2	4.2	74	19	0.87	66.2	4.5	103	117	5.2	5.6	0.06	1.02	39.5	262	0	0.345377	163.883	0.362542	205.99	0.338506
OA0054	87	M	Done			3	0	-3	0	1	182	87	6900	474	42.9	15	16.2	16	17	156	314	17	0.4	193	109	58	110	6.1	3.3	3.6	41	18	1.11	48	4.2	105	122	5.4	5.8	0.1	1.04	32.7	274	1.2	0.42085	349.537	0.429711	676.416	0.403703
OA0007	74	M	Done			1	0	-1	1	1	165	101	3600	457	41.9	14.7	15.1	29	18	265	358	32	0.6	157	89	46	72	6.9	4.3	4.3	206	14	0.94	60.4	6.5	92	128	4.6	4.9	0.05	1.02	31.4	286	0.4	0.361995	201.104	0.359024	410.277	0.33414
OA0009	57	M	Done			2	1	-1	1	1	204	186	8600	558	46.9	16.4	29.9	24	19	338	293	25	0.3	193	125	40	261	7	4.4	4.4	129	16	0.9	68.2	6.2	95	124	5.5	5.9	0.14	0.96	33.6	319	0.2	0.398082	90.636	0.345017	162.855	0.398238
OA0010	73	F	Done			1	1	0	1	1	146	65	6900	412	37.9	12.5	25.8	18	10	187	189	14	0.3	245	160	54	153	6.9	4.3	4.3	73	17	0.54	82.1	3		96	5.2	5.6	0.1	0.97	26.5	392	0.4	0.345051	85.303	0.31323	94.484	0.345507
OA0013	62	M	Done			1	1	0	1	1	220	120	6400	573	50.2	17	25.7	35	26	426	257	42	0.6	288	204	68	78	7.3	4.4	4.4	151	21	0.73	83.7	3.4	164	344	11.1	11.6	0.14	0.96	25.1	417	0	0.360314	141.78	0.330162	238.696	0.356395
OA0016	90	M	Done			8	2	-6	1	1	120	63	7600	467	39.8	12.8	15.6	21	16	231	165	13	0.6	161	94	58	43	6.9	3.9	3.9	124	18	0.7	78.8	6	111	89	5	5.4	0	1.12	30.6	206	0.7	0.41511	365.155	0.360235	527.602	0.341394
OA0017	65	F	Done			1	1	0	1	1	108	68	7600	530	47.7	15.4	23.6	20	16	239	176	19	1	356	235	68	164	7.5	4.7	4.7	70	16	0.61	74.3	4.5	191	144	6.5	6.9	0.17	0.94	23.3	275	0.6	0.364395	103.663	0.318351	296.692	0.323421
OA0018	57	M	Done			0	0	0	1	1	177	90	9000	463	44.1	14.9	17.3	16	13	216	185	26	0.6	215	123	64	171	7.1	4.3	4.3	51	14	0.8	77.6	5.7	100	103	5.5	5.9	0	0.92	29.5	194	0	0.301584	113.754	0.301156	133.904	0.38582
OA0021	81	M	Done			1	1	0	1	1	154	82	6300	452	41.4	14.5	13.7	28	16	216	258	20	0.4	149	81	38	187	6.9	4	4	42	14	0.7	81.2	4.3		236	7.5	7.9	0.09	1.11	32.3	235	0.4	0.382291	133.701	0.380469	106.771	0.362697
OA0026	83	F	Done			1	0	-1	1	1	139	55	5700	385	36.2	12	8.5	28	24	259	345	41	0.5	154	75	59	100	7.3	4.2	4.2	185	15	0.78	52.9	5.3	85	103	5	5.4	0.34	1.07	31.4	346	1.6	0.443906	179.808	0.400613	264.84	0.426195
OA0050	58	M	Done			1	1	0	1	1	181	116																																	0.428531	187.732	0.403076	141.812	0.399592
OA0053	48	F	Done			1	1	0	1	1	130	80	4900	509	42.6	15	40.2	36	17	345	165	20	0.6	247	112	113	37	7.6	4.2	4.2	105	9	0.48	105.4	4.8	89	106	4.7	5	0.11	0.89	26.6	278	0.3	0.403385	141.319	0.35975	139.098	0.362287
OA0059	63	F				2	1	-1	1	1	110	62	6500	470	43.2	14.8	21.6	19	11	194	176	19	0.5	186	73	70	265	7.7	4.4	4.4	52	40	1.61	25.9	6.5	87	106	5.5	5.9	0.29	1.51	29.2	405	2.2			0.466324	188.333	0.456754
OA0060	68	M	Done			3	3	0	1	1	191	110	9100	474	43.7	15.4	29.5	27	18	330	313	16	0.6	187	122	41	78	6.8	4.3	4.3	283	10	0.65	92.6	4.2	82	104	5.3	5.7	0.07	0.96	27.5	330	0.2	0.41522	137.064	0.410157	618.189	0.417759
OA0063	67	F	Done			4	2	-2	1	1	218	118	4600	435	39.6	13.3	25.5	22	16	225	221	13	0.4	208	127	58	79	7	3.8	3.8	61	15	0.69	64.4	5.2	96	110	5.4	5.8	0.11	0.95	35.1	405	0.2	0.415878	106.745
OA0079	92	M	Done			1	1	0	1	1	182	90	6200	418	39.6	13.2	23.8	30	17	232	239	46	0.3	247	152	29	331	7	4.1	4.1	317	12	0.8	67.9	6.1	91	90	4.9	5.3	0.05	1.03	28.7	336	0.5	0.413921	304.085	0.441407	199.538	0.409979
OA0081	97	M				2	2	0	1	1	120	64	7800	423	39.6	13.6	12.3	23	22	327	188	35	0.6	223	127	78	88	6	3.7	3.7	129	33	1.29	39.5	5.5	86	131	5.5	5.9	0.07	1	28	267	3.9	0.423609	255.024	0.406802	339.693
OA0034	66	M				2	1	-1	2	1																																			0.438026	118.344	0.42424	120.11	0.415469
OA0048	74	M	Done			3	1	-2	2	1	147	89	12400	506	45.9	15.2	16.9	14	11	175	247	14	0.8	240	165	53	94	7.6	7.6	7.6	31	17	0.72	81.4	2.9	90	131	4.8	5.1	0.76	1.13	31	360	2.9	0.368803	152.281	0.329619	226.527	0.366554
OA0062	68	M	Done			4	3	-1	2	1	241	131	5400	528	44.3	15.5	18.1	25	21	273	224	90	1.2	284	183	64	112	7.3	4.4	4.4	115	14	0.64	94.2	7.1	98	106	5.4	5.8	0.43	0.95	28.7	419	0.4	0.441689	126.657	0.413384	114.057	0.41082
OA0046	56	M	Done			1	0	-1	0	2	186	124	7700	452	42	14.3	26.6	35	24	387	152	35	0.8	224	75	120	47	7.3	4.6	4.6	150	16	0.92	66.9	6.7	84	95	5	5.4	0	0.94	29.2	248	0	0.359727	186.756	0.393901	214.145	0.370932
OA0080	75	M	Done			3	0	-3	1	2	149	72	6800	475	40.1	14.2	25.1	21	20	199	166	22	0.6	164	86	57	101	6.7	4.2	4.2	72	15	0.84	68	6.5	111	109	5.9	6.3	0	0.93	29.5	202	0.6	0.42934	190.714	0.445964	290.36	0.417744
OA0019	57	M	Done			6	2	-4	2	2	166	89	9400	501	42.4	14.4	21.3	13	17	174	261	18	0.6	217	134	39	184	6.9	3.8	3.8	56	15	1.32	44.9	6.2	247	427	12.5	13	0.1	0.97	26.9	322	0.3	0.435117	184.492	0.408194	518.215	0.438478
OA0071	78	F	Done			2	2	0	2	2	168	85	5000	474	44.3	14.9	26.3	20	11	256	201	10	1	157	80	52	126	6.6	4.3	4.3	66	15	0.7	62.1	5.8	87	106	5	5.4	0.06	1.02	23.5	333	1.4	0.477443	116.757	0.467068	165.237	0.457539
OA0002	74	F	Done			10	8	-2	4	2	157	76	6700	400	37.7	12.7	24.1	17	11	177	256	18	0.3	245	144	61	188	6.3	3.9	3.9	56	16	0.63	69.1	4.9	103	146	5.7	6.1	0.1	0.95	29.1	286	1.8	0.386865	125.617	0.331792	185.49	0.380997
OA0078	53	M	Done			3	4	1	4	2	189	110	9600	543	49.5	17.5	25.5	57	103	228	159	144	0.7	239	161	46	200	7.6	4.4	4.4	106	12	0.94	66.4	8.6	86	148	6.3	6.7	0.18	0.91	26.1	245	0	0.391497	155.339	0.405147	177.783	0.374692
OA0049	83	F	Done			0	0	0	1	3	184	72	5500	389	38	12.6	10.6	21	16	245	208	19	0.9	193	105	64	101	7	4.1	4.1	66	26	0.97	41.7	5.8	100	80	5	5.4	0.07	0.99	28.8	304	2.5	0.369407	276.333	0.362338	441.307	0.443092
OA0005	73	M	Done		Done	14	5	-9	3	3	101	77	10700	536	46.1	15.9	25	46	39	444	264	28	1.1	164	69	72	42	5.9	3.2	3.5	188	17	0.81	71.3	7	102	118	5.1	5.5	11.39	1.21	31.7	572	2.9	0.494823	201.81	0.504399	187.905	0.452123
OA0023	67	F	Done			1	1	0	3	3	131	70	7300	403	36.6	12	27.1	28	10	181	164	11	0.3	186	102	41	202	7.5	4	4	89	16	0.59	76.4	5.5	87	102	5.1	5.5	0.78	1.13	30.9	268	0.6	0.484393	420.337	0.392254	437.088	0.404243
OA0029	89	F	Done			1	1	0	3	3	149	77	4400	447	35.2	11.5	15.3	24	15	275	324	25	0.6	199	102	65	102	6.8	4	4	81	15	0.6	69.1	5.5	90	96	5.2	5.6	0.09	1.07	27.9	289	2.5	0.43773	177.901	0.403792	252.959	0.411514
OA0069	81	F	Done			0	0	0	3	3	123	62	8200	467	41.6	14	18.4	27	20	337	302	19	1.5	204	132	47	124	6.9	4	4	49	9	0.53	81.3	2.5	88	97	5.6	6	0.53	0.99	29.8	312	2	0.457868	178.836	0.437573	234.802	0.463891
OA0070	89	F	Done			3	2	-1	3	3	168	87	7900	393	36.2	12.6	18.2	25	10	272	305	9	1.4	231	161	58	62	7.1	3.4	3.7	115	29	0.85	47.2	3.7	83	110	4.7	5	3.41	1.05	30.8	366	13.2	0.44513	196.488	0.45119	518.718	0.459884
OA0014	68	M	Done			5	5	0	4	3	169	102	5200	469	45	14.5	15.2	31	26	190	264	146	0.3	181	88	59	200	6.9	4.2	4.2	67	20	0.81	72.8	6.1	87	88	5	5.4	0.14	0.99	27.7	268	0.3	0.338379	183.187	0.343364	228.571	0.347997
OA0036	88	F	Done			18	7	-11	4	3	208	74	7300	277	28.3	9.6	20.7	25	24	221	169	31	0.4	165	91	41	143	6.9	4	4	214	20	0.72	56.8	6.3	107	107	5.9	6.3	0.09	1.06	29	253	2.4	0.449206	220.141	0.44098	263.831	0.421778
OA0037	80	M	Done			9	8	-1	4	3	123	85	8900	497	48.3	16.3	22.3	26	16	261	166	27	1.1	166	105	43	113	6.8	4.1	4.1	193	12	0.9	62.8	5.1	110	87	5.8	6.2	0.37	1.11	28.6	423	0.8	0.470751	223.774	0.436126	249.022	0.451205
OA0073	63	M	Done			2	4	2	4	3	178	93	6500	719	54.9	19.6	29	14	30	167	518	46	0.6	253	172	37	311	6.9	4	4	38	13	0.56	111.4	5.6	171	326	9.5	9.9	0.11	0.89	24.4	325	0.3	0.359429	90.237	0.362	195.816	0.387955
OA0045	73	F	Done			1	2	1	3	4	178	110	6600	407	37.3	12.6	17.4	19	11	171	360	14	0.4	185	106	52	100	7.3	3.7	3.7	36	13	0.46	97.9	5.6	69	97	5.4	5.8	0.21	0.96	27.1	312	9.8	0.388619	190.476	0.400605	229.604	0.412754
OA0004	85	M				3	3	0	4	4	129	71	12000	403	34.9	11.6	38.9	30	13	413	137	14	0.6	224	131	39	152	6.1	3.3	3.6	145	10	1.32	40	5.4	170	125	5.8	6.2	12.46	1.13	28.6	484	1.3	0.459176	536.01	0.410876	641.456	0.335414
OA0042	62	M	Done			9	7	-2	4	4	135	76	8200	538	51.9	17.1	15.6	21	23	140	189	12	1	159	85	51	144	7.1	4	4	72	24	1.14	51.4	5.7	87	116	5.1	5.5	0.1	1.05	29.3	240	3.1	0.373233	188.166	0.388758	209.098	0.404823
OA0057	80	M	Done			12	0	-12	4	4	168	97	9600	547	48.1	16.7	20.7	34	29	275	274	52	0.8	182	117	43	85	7.6	4.3	4.3	90	14	1.03	53.4	6.9	101	109	5.5	5.9	1.12	0.97	35.9	398	3.9	0.477725	136.523	0.469503	181.12	0.474345
OA0058	69	F	Done			8	6	-2	4	4	215	109	5100	398	38.2	13.4	16.3	27	16	397	278	73	0.4	222	105	84	53	8.4	4.6	4.6	167	17	0.38	122.6	2.7	88	138	3.9	4.2	0.12	0.97	25.9	320	5.2	0.442298	186.08	0.431596	421.347	0.437997
OA0065	92	F	Done			2	7	5	4	4	141	84	4700	417	38.9	13.5	18.2	25	15	257	169	27	0.4	145	71	44	78	6.4	3.9	3.9	64	12	0.68	59.7	5.1	83	86	4.7	5	0.15	0.97	29.7	193	6	0.406561	133.498	0.420438	159.338	0.404926
OA0066	70	M	Done			4	8	4	4	4	176	87	5400	497	44	15	14.5	21	23	150	264	26	1.7	234	134	50	170	7.5	4.8	4.8	38	12	0.66	90.3	5.6	108	108	5.1	5.5	0	0.99	29.1	303	0.6	0.379751	167.176	0.366522	561.128	0.396821
OA0074	71	F	Done			8	10	2	4	4	207	149	7500	560	48	16.5	29	22	16	330	338	22	0.6	285	174	74	142	8	4.7	4.7	106	12	0.51	88.1	4.5	117	143	6.9	7.3	0.21	0.97	32.6	271	0.5	0.448181	235.116	0.410493	234.923	0.439787
OA0006	82	F				0	13	13	5	4	131	83	7000	343	33.5	10.5	12.4	43	36	322	336	32	0.7	153	95	46	61	6.9	3.6	3.6	98	43	1.49	26.2	7	125	118	4.7	5	0.16	1.07	32	210	22.5	0.445571	438.374	0.48486	278.088	0.415282
OA0075	70	M				3	4	1	5	6	139	87	6800	448	41.1	13.9	17.3	23	32	238	230	9	0.4	169	95	49	80	7.3	3.9	3.9	53	31	1.77	30.7	5.8	120	159	6.1	6.5	0.16	0.97	31.2	344	1.4	0.481699	292.084	0.452324	746.466	0.434835
[truncated: 1 more columns]
